# Supplementary figures and images for: Incorporation of magnesium in mesostructured and mesoporous aluminophosphates
Source: Royal Society of Chemistry journal article supplement (doi:10.1039/b010029n), 2001-01-01

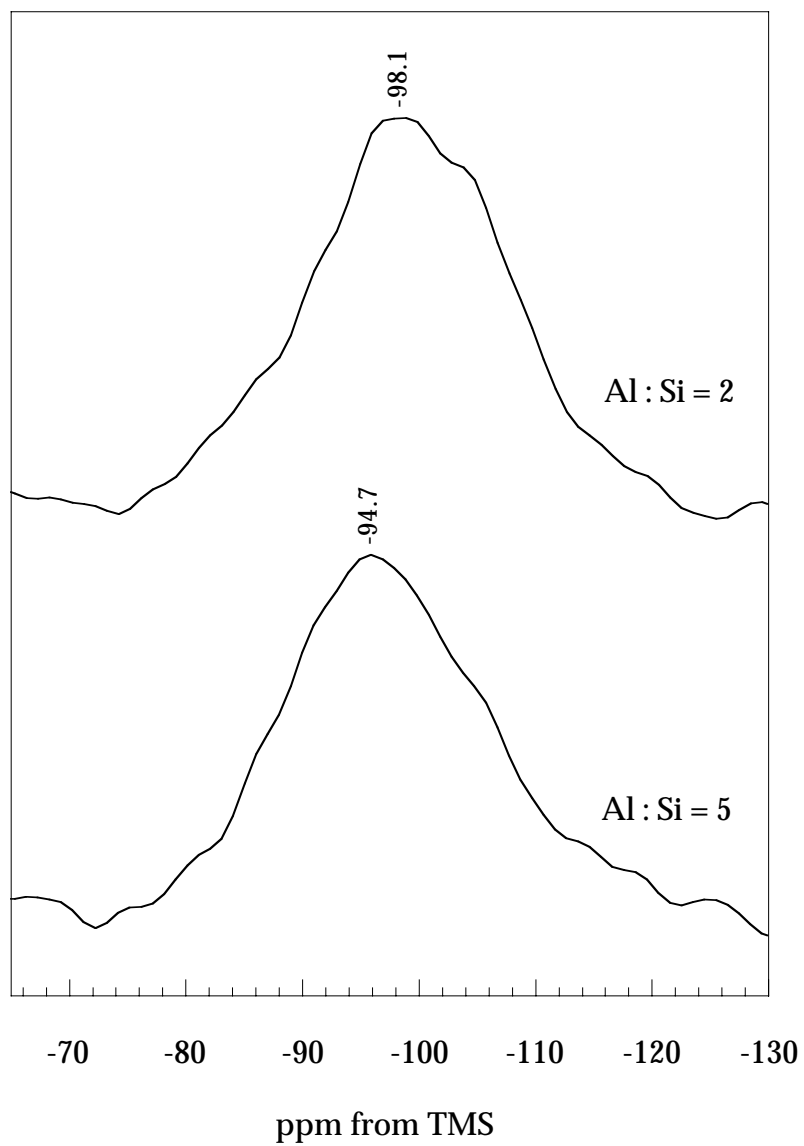

Supplement: figure_s1.pdf [file figure_s1.pdf]

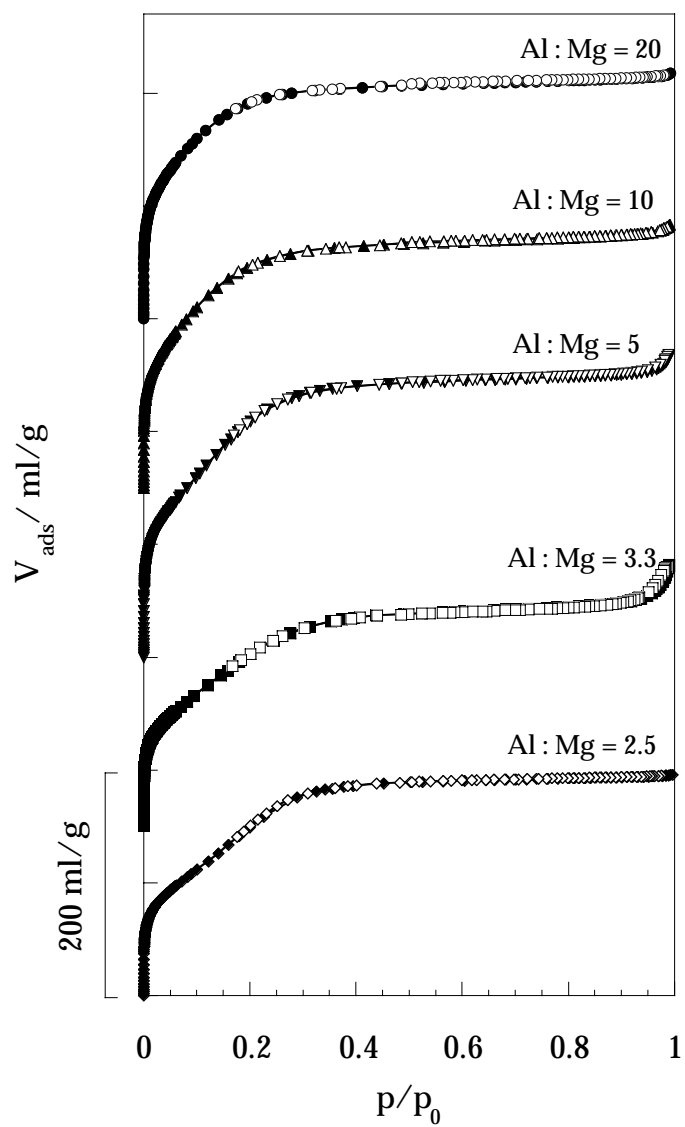

Supplement: figure_s2.pdf [file figure_s2.pdf]

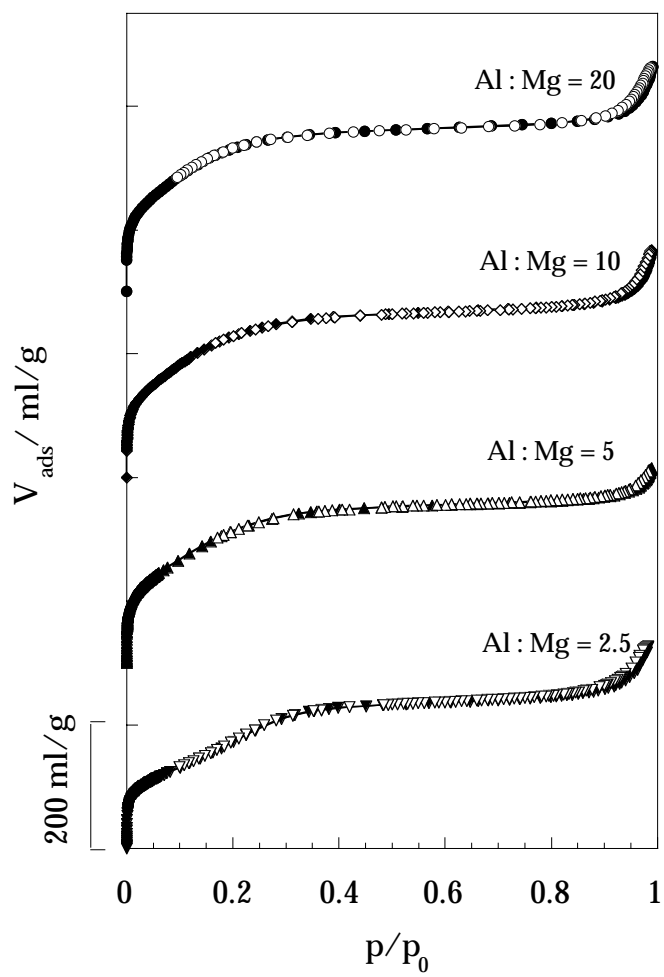

Supplement: figure_s3.pdf [file figure_s3.pdf]

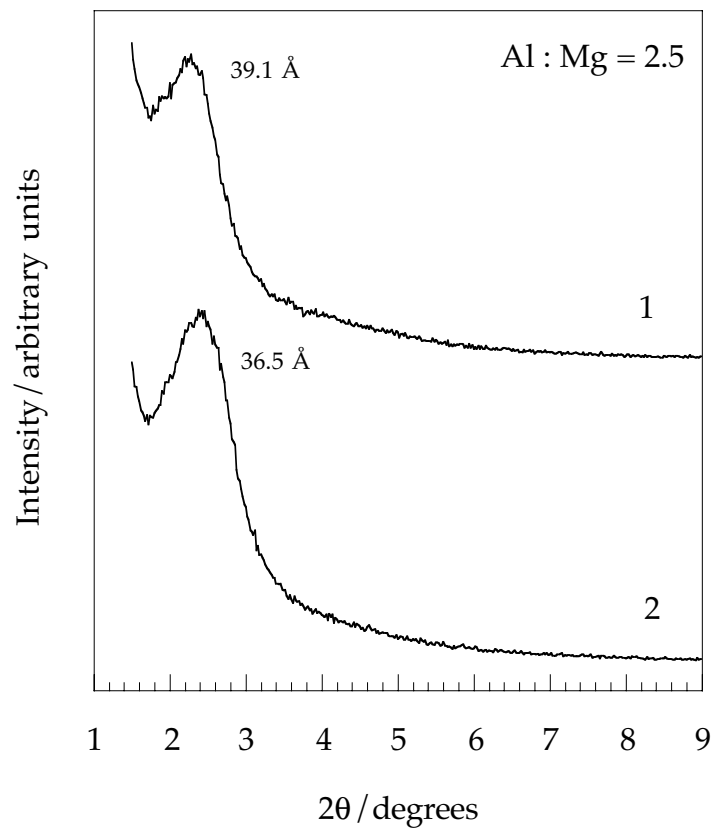

Supplement: figure_s4.pdf [file figure_s4.pdf]
